# Supplementary material
Source: MDPI journal article supplement (https://www.mdpi.com/2072-4292/14/9/2109)
Supplement: s1 [file s1]

**Supplementary Table S1.** Description of soil quality indicators.

| Name                             | Description                                                                                                                                                  | Units | Indicator source                                                                                | Data source                                      | Reference |
|----------------------------------|--------------------------------------------------------------------------------------------------------------------------------------------------------------|-------|-------------------------------------------------------------------------------------------------|--------------------------------------------------|-----------|
| Irrigation and drainage capacity | Irrigation water sources, water conservancy facilities, and drainage capacity.                                                                               | -     | Irrigation zoning map                                                                           |                                                  |           |
| Parts of the terrain             | Small and medium-sized geomorphic units with specific morphological characteristics and genesis.                                                             | -     | Geomorphic map                                                                                  |                                                  |           |
| Effective soil thickness         | The total thickness of soil above the parent material layer that can be used by crops.                                                                       | cm    | Distribution map of effective soil thickness                                                    | Summary and compilation of county survey results |           |
| Plough layer texture             | The size and combination of soil particles in the plough layer.                                                                                              | -     | Plough layer texture map                                                                        |                                                  |           |
| Soil texture profile             | The arrangement of different texture levels in the soil profile.                                                                                             | -     | Distribution map of soil profile configuration                                                  |                                                  |           |
| Soil salinization                | The accumulation of salinity in the surface soil.                                                                                                            | %     | Distribution map of soil salinization                                                           |                                                  |           |
| Biodiversity                     | The ecological complex is formed by natural organisms and their environment and the synthesis of various ecological processes.                               | -     | Field investigation and comprehensive discrimination of soil microorganisms or animals.         |                                                  | [29]      |
| Farmland shelterbelt             | The extent to which the forest belt around the farmland protects the farmland area.                                                                          | %     | Field investigation and comprehensive discrimination of forest belt protection around farmland. | Soil investigation                               |           |
| Organic matter                   | It was determined by measuring soil organic carbon with quantitative potassium dichromate - sulfuric acid solution under the condition of sand bath heating. | g/kg  | Laboratory analysis                                                                             |                                                  |           |
| Available phosphorus             | It was extracted with 0.5 mol/dm <sup>3</sup> sodium bicarbonate and then measured by using the molybdenum antimony colorimetric method (Olsen method).      | mg/kg |                                                                                                 |                                                  |           |

| Name                        | Description                                                                                                     | Units | Indicator source    | Data source        | Reference |
|-----------------------------|-----------------------------------------------------------------------------------------------------------------|-------|---------------------|--------------------|-----------|
| Rapidly available potassium | It was extracted with 1 mol/dm <sup>3</sup> ammonium acetate and then measured by the flame photometric method. | mg/kg |                     |                    |           |
| Total nitrogen              | It was digested by concentrated sulfuric acid and then determined by the Kjeldahl digestion method.             | g/kg  | Laboratory analysis | Soil investigation | [29]      |
| pH value                    | It was extracted with 1 mol/dm <sup>3</sup> KCl solution and then measured by the glass electrode method.       | -     |                     |                    |           |

**Supplementary Table S2.** Descriptive statistical and analysis table of soil quality evaluation indicators.

| Indicators                              |                                  | Membership value statistics |               |            | Standard deviation | Factor weight |
|-----------------------------------------|----------------------------------|-----------------------------|---------------|------------|--------------------|---------------|
|                                         |                                  | Minimum value               | Maximum value | Mean value |                    |               |
| Physical properties                     | Irrigation and drainage capacity | 0.50                        | 1.00          | 0.81       | 0.15               | 0.16          |
|                                         | Parts of the terrain             | 0.20                        | 1.00          | 0.85       | 0.18               | 0.13          |
|                                         | Effective soil thickness         | 0.40                        | 1.00          | 0.91       | 0.16               | 0.08          |
|                                         | Plough layer texture             | 0.40                        | 1.00          | 0.88       | 0.12               | 0.10          |
|                                         | Soil texture profile             | 0.25                        | 1.00          | 0.78       | 0.18               | 0.08          |
|                                         | Soil salinization                | 0.35                        | 1.00          | 0.98       | 0.06               | 0.03          |
| Chemical properties                     | Organic matter                   | 0.10                        | 1.00          | 0.47       | 0.15               | 0.12          |
|                                         | Available phosphorus             | 0.10                        | 1.00          | 0.50       | 0.27               | 0.07          |
|                                         | Rapidly available potassium      | 0.10                        | 1.00          | 0.73       | 0.24               | 0.06          |
|                                         | Total nitrogen                   | 0.10                        | 1.00          | 0.61       | 0.19               | 0.08          |
|                                         | pH value                         | 0.50                        | 1.00          | 0.86       | 0.08               | 0.05          |
| Biological and environmental properties | Biodiversity                     | 0.60                        | 1.00          | 0.86       | 0.09               | 0.02          |
|                                         | Farmland shelterbelt             | 0.60                        | 1.00          | 0.80       | 0.11               | 0.02          |

**Supplementary Table S3.** Descriptive statistical table of soil quality characteristic indicators.

| Indicators                  |                                      | Category |          | Minimum value | Maximum value | Mean value | Standard deviation | Units     |
|-----------------------------|--------------------------------------|----------|----------|---------------|---------------|------------|--------------------|-----------|
| Production press indicators | Slope                                |          |          | 0.00          | 36.43         | 1.36       | 2.03               | degress   |
|                             | Annual average precipitation         |          | -        | 507.83        | 878.67        | 722.43     | 44.19              | mm        |
|                             | Annual average temperature           |          |          | 12.37         | 15.63         | 13.98      | 0.31               | C°        |
| Soil status indicators      | Soil fertility indicator             | Method A | -        | 0.00          | 1.00          | 0.74       | 0.12               | -         |
|                             |                                      | Method B |          | 0.00          | 1.00          | 0.71       | 0.13               |           |
|                             |                                      |          |          | 0.00          | 1.00          | 0.68       | 0.14               |           |
|                             |                                      | Method C |          | 0.00          | 0.85          | 0.71       | 0.12               |           |
|                             |                                      |          |          | 0.00          | 1.00          | 0.79       | 0.14               |           |
|                             |                                      | Method A | -        | 0.00          | 0.75          | 0.31       | 0.07               |           |
|                             | Soil moisture indicator              | Method B |          | 0.00          | 0.75          | 0.29       | 0.08               |           |
|                             |                                      |          | 0.00     | 0.57          | 0.29          | 0.08       |                    |           |
|                             |                                      |          | Method C |               | 0.00          | 0.71       | 0.32               |           |
|                             |                                      |          |          | 0.00          | 0.60          | 0.36       | 0.07               |           |
|                             | Soil degradation indicator           | Method A | -        | 0.00          | 30.00         | 8.54       | 4.39               |           |
|                             |                                      | Method B |          | 0.00          | 30.00         | 7.30       | 3.75               |           |
|                             |                                      |          |          | 0.00          | 30.00         | 6.61       | 3.55               |           |
|                             |                                      | Method C |          | 0.00          | 26.00         | 2.99       | 2.41               |           |
|                             |                                      |          |          | 0.00          | 30.00         | 6.47       | 2.52               |           |
| Social action indicators    | Agricultural labour indicator        |          |          | 0.00          | 87.56         | 47.59      | 14.11              | %         |
|                             | Agricultural mechanization indicator |          |          | 0.00          | 84.47         | 14.34      | 7.00               | kW/ha     |
|                             | Agricultural irrigation indicator    |          | -        | 0.00          | 100           | 62.64      | 27.51              | %         |
|                             | Agricultural fertilizer indicator    |          |          | 0.00          | 2393.02       | 653.14     | 334.48             | kg NPK/ha |

Note: Method A, Method B, and Method C are the no distinction between crop cover types, distinction between crop cover types, and fusion of multi-temporal data types, respectively. I and II are the one-season crop area and double-season crop area.

Supplementary Table S4. Principal component analysis results of soil state indicators.

|                         | Indicator | Expression            | Synthesis period (t)               | Expression of principal components                                                                                                                                                                                                                     |
|-------------------------|-----------|-----------------------|------------------------------------|--------------------------------------------------------------------------------------------------------------------------------------------------------------------------------------------------------------------------------------------------------|
| One-season crop area    | MT-NDVI   | $0.553 \times PC_1 +$ | 177-192, 193-208, 209-224,         | $PC_1 = 0.565 \times NDVI_{209-224} + 0.497 \times NDVI_{193-208} + 0.461 \times NDVI_{225-240} + 0.419 \times NDVI_{177-192} + 0.212 \times NDVI_{241-256}$                                                                                           |
|                         |           | $0.282 \times PC_2$   | 225-240, 241-256                   | $PC_2 = 0.055 \times NDVI_{209-224} - 0.261 \times NDVI_{193-208} + 0.359 \times NDVI_{225-240} - 0.526 \times NDVI_{177-192} + 0.724 \times NDVI_{241-256}$                                                                                           |
|                         | MT-DVI    | $0.531 \times PC_1 +$ | 177-192, 193-208, 209-224,         | $PC_1 = 0.500 \times DVI_{225-240} + 0.483 \times DVI_{209-224} + 0.406 \times DVI_{193-208} + 0.379 \times DVI_{257-272} + 0.329 \times DVI_{241-256} + 0.316 \times DVI_{177-192}$                                                                   |
|                         |           | $0.298 \times PC_2$   | 225-240, 241-256, 257-272          | $PC_2 = 0.112 \times DVI_{225-240} - 0.163 \times DVI_{209-224} - 0.442 \times DVI_{193-208} + 0.482 \times DVI_{257-272} + 0.536 \times DVI_{241-256} - 0.496 \times DVI_{177-192}$                                                                   |
|                         | MT-RVI    | $0.558 \times PC_1 +$ | 193-208, 209-224, 225-240,         | $PC_1 = 0.509 \times RVI_{209-224} + 0.497 \times RVI_{225-240} + 0.431 \times RVI_{241-256} + 0.402 \times RVI_{257-272} + 0.383 \times RVI_{193-208}$                                                                                                |
|                         |           | $0.254 \times PC_2$   | 241-256, 257-272                   | $PC_2 = -0.393 \times RVI_{209-224} - 0.058 \times RVI_{225-240} + 0.534 \times RVI_{241-256} + 0.513 \times RVI_{257-272} - 0.542 \times RVI_{193-208}$                                                                                               |
| Double-season crop area | MT-NDVI   |                       |                                    | $PC_1 = 0.472 \times NDVI_{097-112} + 0.468 \times NDVI_{081-096} + 0.458 \times NDVI_{113-128} + 0.379 \times NDVI_{129-144} - 0.190 \times NDVI_{289-304} - 0.234 \times NDVI_{273-288} + 0.228 \times NDVI_{337-352} + 0.249 \times NDVI_{065-080}$ |
|                         |           | $0.524 \times PC_1 +$ | 065-080, 081-096, 097-112,         |                                                                                                                                                                                                                                                        |
|                         |           | $0.178 \times PC_2 +$ | 113-128, 129-144, 273-288,         | $PC_2 = 0.013 \times NDVI_{097-112} - 0.097 \times NDVI_{081-096} + 0.086 \times NDVI_{113-128} + 0.324 \times NDVI_{129-144} + 0.713 \times NDVI_{289-304} + 0.444 \times NDVI_{273-288} + 0.402 \times NDVI_{337-352} + 0.100 \times NDVI_{065-080}$ |
|                         | MT-DVI    | $0.133 \times PC_3$   | 289-304, 337-352                   | $PC_3 = 0.138 \times NDVI_{097-112} - 0.004 \times NDVI_{081-096} + 0.284 \times NDVI_{113-128} + 0.379 \times NDVI_{129-144} - 0.088 \times NDVI_{289-304} + 0.428 \times NDVI_{273-288} - 0.562 \times NDVI_{337-352} - 0.501 \times NDVI_{065-080}$ |
|                         |           |                       |                                    | $PC_1 = 0.477 \times DVI_{097-112} + 0.435 \times DVI_{113-128} + 0.433 \times DVI_{129-144} + 0.428 \times DVI_{081-096} + 0.328 \times DVI_{065-080} + 0.235 \times DVI_{177-192} + 0.223 \times DVI_{145-160}$                                      |
|                         |           | $0.143 \times PC_2$   | 113-128, 129-144, 145-160, 177-192 | $PC_2 = -0.078 \times DVI_{097-112} - 0.032 \times DVI_{113-128} + 0.275 \times DVI_{129-144} - 0.363 \times DVI_{081-096} - 0.358 \times DVI_{065-080} + 0.112 \times DVI_{177-192} + 0.803 \times DVI_{145-160}$                                     |
| Double-season crop area | MT-RVI    |                       |                                    | $PC_1 = 0.473 \times RVI_{097-112} + 0.472 \times RVI_{081-096} + 0.457 \times RVI_{113-128} + 0.371 \times RVI_{129-144} + 0.253 \times RVI_{065-080} - 0.213 \times RVI_{289-304} + 0.203 \times RVI_{337-352} - 0.236 \times RVI_{273-288}$         |
|                         |           | $0.523 \times PC_1 +$ | 065-080, 081-096, 097-112,         |                                                                                                                                                                                                                                                        |
|                         |           | $0.174 \times PC_2 +$ | 113-128, 129-144, 273-288,         | $PC_2 = 0.001 \times RVI_{097-112} - 0.069 \times RVI_{081-096} + 0.039 \times RVI_{113-128} + 0.296 \times RVI_{129-144} + 0.201 \times RVI_{065-080} + 0.700 \times RVI_{289-304} + 0.469 \times RVI_{337-352} + 0.395 \times RVI_{273-288}$         |
|                         | MT-DVI    | $0.138 \times PC_3$   | 289-304, 337-352                   | $PC_3 = 0.146 \times RVI_{097-112} - 0.035 \times RVI_{081-096} + 0.293 \times RVI_{113-128} + 0.415 \times RVI_{129-144} - 0.453 \times RVI_{065-080} + 0.019 \times RVI_{289-304} - 0.531 \times RVI_{337-352} + 0.481 \times RVI_{273-288}$         |
|                         |           |                       |                                    |                                                                                                                                                                                                                                                        |
|                         |           |                       |                                    |                                                                                                                                                                                                                                                        |

Note: MT-NDVI, MT-DVI, and MT-RVI are the fusion of multi-temporal soil fertility indicator, soil moisture indicator, and soil degradation indicator, respectively.  $PC_1$ ,  $PC_2$ , and  $PC_3$  represent principal components 1, 2, and 3, respectively.  $NDVI_t$ ,  $DVI_t$ , and  $RVI_t$  represent the soil fertility indicator, soil moisture indicator, and soil degradation indicator of corresponding synthetic period of MODIS images, respectively.
